# Supplementary material for: The Driving Factors of Carbon Emissions in China’s Transportation Sector: A Spatial Analysis
Source: Frontiers journal article supplement (doi:10.3389/fenrg.2021.664046), 2021-05-12
Supplement: Data_Sheet_2.pdf [file Data_Sheet_2.pdf]

**Appendix B CO<sub>2</sub> emission factors for various fossil fuels**

|                                     | <b>NCV (PJ/104 tonnes, 108<br/>m3)</b> | <b>CC (tonne<br/>C/TJ)</b> | <b>Oxygenation<br/>efficiency</b> |
|-------------------------------------|----------------------------------------|----------------------------|-----------------------------------|
| <b>Raw Coal</b>                     | 0.21                                   | 26.32                      | 74%                               |
| <b>Cleaned Coal</b>                 | 0.26                                   | 26.32                      | 74%                               |
| <b>Other Washed Coal</b>            | 0.15                                   | 26.32                      | 74%                               |
| <b>Briquettes</b>                   | 0.18                                   | 26.32                      | 74%                               |
| <b>Coke</b>                         | 0.28                                   | 31.38                      | 89%                               |
| <b>Coke Oven Gas</b>                | 1.61                                   | 21.49                      | 91%                               |
| <b>Other Gas</b>                    | 0.83                                   | 21.49                      | 91%                               |
| <b>Other Coking Products</b>        | 0.28                                   | 27.45                      | 89%                               |
| <b>Crude Oil</b>                    | 0.43                                   | 20.08                      | 96%                               |
| <b>Gasoline</b>                     | 0.44                                   | 18.9                       | 96%                               |
| <b>Kerosene</b>                     | 0.44                                   | 19.6                       | 96%                               |
| <b>Diesel Oil</b>                   | 0.43                                   | 20.2                       | 96%                               |
| <b>Fuel Oil</b>                     | 0.43                                   | 21.1                       | 96%                               |
| <b>LPG</b>                          | 0.47                                   | 20                         | 97%                               |
| <b>Refinery Gas</b>                 | 0.43                                   | 20.2                       | 97%                               |
| <b>Other Petroleum<br/>Products</b> | 0.51                                   | 17.2                       | 96%                               |
| <b>Natural Gas</b>                  | 3.89                                   | 15.32                      | 98%                               |
| <b>Heat</b>                         | 0                                      | 0                          | 0%                                |
| <b>Electricity</b>                  | 0                                      | 0                          | 0%                                |
| <b>Other Energy</b>                 | 0                                      | 0                          | 0%                                |
